# Supplementary material
Source: PubMed Central journal article supplement (PMC5955775)

**554 Supplementary Material***555 MRI acquisitions*

556 MRI exams were conducted on MAGNETOM 1.5T Aera or Avanto (n=94) and 3T Skyra (n=12)  
557 scanners (Siemens Medical Systems, Erlangen, Germany), after injection of a gadolinium-based  
558 contrast agent (0.03 mol/kg Ablavar, Lantheus Medical Imaging, N. Billerica, MA, USA; or 0.1-  
559 0.2 mmol/kg Gadavist or Magnevist, Bayer, Leverkusen, Germany; or 0.1-0.2 mmol/kg  
560 Multihance, Bracco Diagnostics Inc., Township, NJ, USA).

561 Prospectively ECG-gated 4D flow MRI data were acquired in a sagittal volume encompassing  
562 the thoracic aorta. Respiration gating was achieved by means of a 16 mm-acceptance window  
563 size navigator placed on the lung-liver interface. Parallel imaging (GRAPPA) along the phase  
564 encoding direction (y) was used with a reduction factor R=2 (24 reference lines) to accelerate the  
565 acquisition. Other sequence parameters were as follows: repetition time=4.8±0.1 ms; echo  
566 time=2.4±0.1 ms; flip angle=15°; acquisition matrix=160x80-100; isotropic pixel in-plane  
567 spacing=2.18±0.13 [2.125-2.6875] mm; slice thickness=2.88±0.32 [2.4-3.8] mm; 2 k-space  
568 segments per cardiac time frame; temporal resolution=38.3±0.65 [36.8-40] ms; number of  
569 slices=23-36; receiver bandwidth=445-460 Hz/pixel; encoding sensitivity Venc=150-300 cm/s  
570 depending on the presence and severity of aortic valve stenosis.

*571 Assessment of left ventricular and aortic valve function as well as aortic dimensions*

572 Left ventricular (LV) end-systolic (ESV) and end-diastolic (EDV) volumes were measured with  
573 conventional contouring of ECG-gated cine balanced steady state free precession (bSSFP) short-  
574 axis images covering the left ventricle, while including the papillary muscles and chamber

575 trabecula using QMass v7.2 (Medis, Leiden, The Netherlands), to calculate stroke volume and  
576 ejection fraction.

577 Aortic valve morphology and function were determined using cine bSSFP and 2D PC images  
578 obtained at the level of the aortic valve. BAV morphology was classified according to Sievers  
579 classification(1). Aortic valve stenosis and regurgitation severity was classified as none, trace,  
580 mild, moderate or severe according to published guidelines(2).

581 Aortic diameter measurements were obtained from CE-MRA images at the sinuses of Valsalva  
582 (SOV) and mid-ascending aorta (mid-AA) using the open-source, free DICOM medical image  
583 viewer Horos™ (2015, <http://www.horosproject.org/>; based off of OsiriX). SOV diameter was  
584 the maximal value among the 3 sinus-to-sinus measurements, including the external walls. Mid-  
585 AA diameter was the maximal value over 2 orthogonal measurements in a reformatted plane  
586 orthonormal to the aorta, including the external walls(3).

#### 587 *4D flow MRI data analysis*

588 For each baseline and follow-up 4D flow dataset, preprocessing was first applied using a  
589 previously described Matlab program (The Mathworks, Natick, MA, USA)(4), including eddy  
590 current correction, background noise suppression and velocity aliasing unwrapping. A 3D  
591 angiogram (PC-MRA) was computed by multiplying absolute velocity by magnitude images and  
592 averaging over all cardiac phases(4), to segment the aortic volume (Mimics, Materialize, Leuven,  
593 Belgium) and subsequently mask the flow velocities (Figure 1.a).

594

595

596 **References**

- 597 1. Sievers HH, Schmidtke C. A classification system for the bicuspid aortic valve from 304  
598 surgical specimens. *J Thorac Cardiovasc Surg.* 2007;133:1226-33.
- 599 2. Erbel R, Aboyans V, Boileau C, Bossone E, Bartolomeo RD, Eggebrecht H, et al. 2014  
600 ESC Guidelines on the diagnosis and treatment of aortic diseases: Document covering acute and  
601 chronic aortic diseases of the thoracic and abdominal aorta of the adult. The Task Force for the  
602 Diagnosis and Treatment of Aortic Diseases of the European Society of Cardiology (ESC). *Eur*  
603 *Heart J.* 2014;35:2873-926.
- 604 3. Trinh B, Dubin I, Rahman O, Ferreira Botelho MP, Naro N, Carr JC, et al. Aortic  
605 Volumetry at Contrast-Enhanced Magnetic Resonance Angiography: Feasibility as a Sensitive  
606 Method for Monitoring Bicuspid Aortic Valve Aortopathy. *Invest Radiol.* 2017;52:216-22.
- 607 4. Schnell S, Entezari P, Mahadewia RJ, Malaisrie SC, McCarthy PM, Collins JD, et al.  
608 Improved Semiautomated 4D Flow MRI Analysis in the Aorta in Patients With Congenital  
609 Aortic Valve Anomalies Versus Tricuspid Aortic Valves. *J Comput Assist Tomogr.*  
610 2016;40:102-8.

611

612 **Supplementary figure legend.** Consort flow diagram for retrospective cohort identification  
613 from an institutional database of aortic 4D flow MRI examinations.

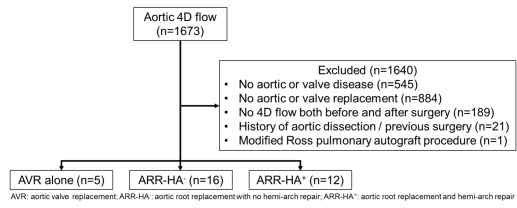

Supplement: NIHMS930763-supplement-supplement_1.pdf [file NIHMS930763-supplement-supplement_1.pdf]
